# Supplementary material for: Comprehensive analysis of the prognosis and immune infiltration for CXC chemokines in colorectal cancer
Source: PubMed Central journal article supplement (PMC8312455; doi:10.18632/aging.203245), 2021-07-07
Supplement: aging-13-203245-s001.pdf [file aging-13-203245-s001.pdf]

**SUPPLEMENTARY FIGURES**

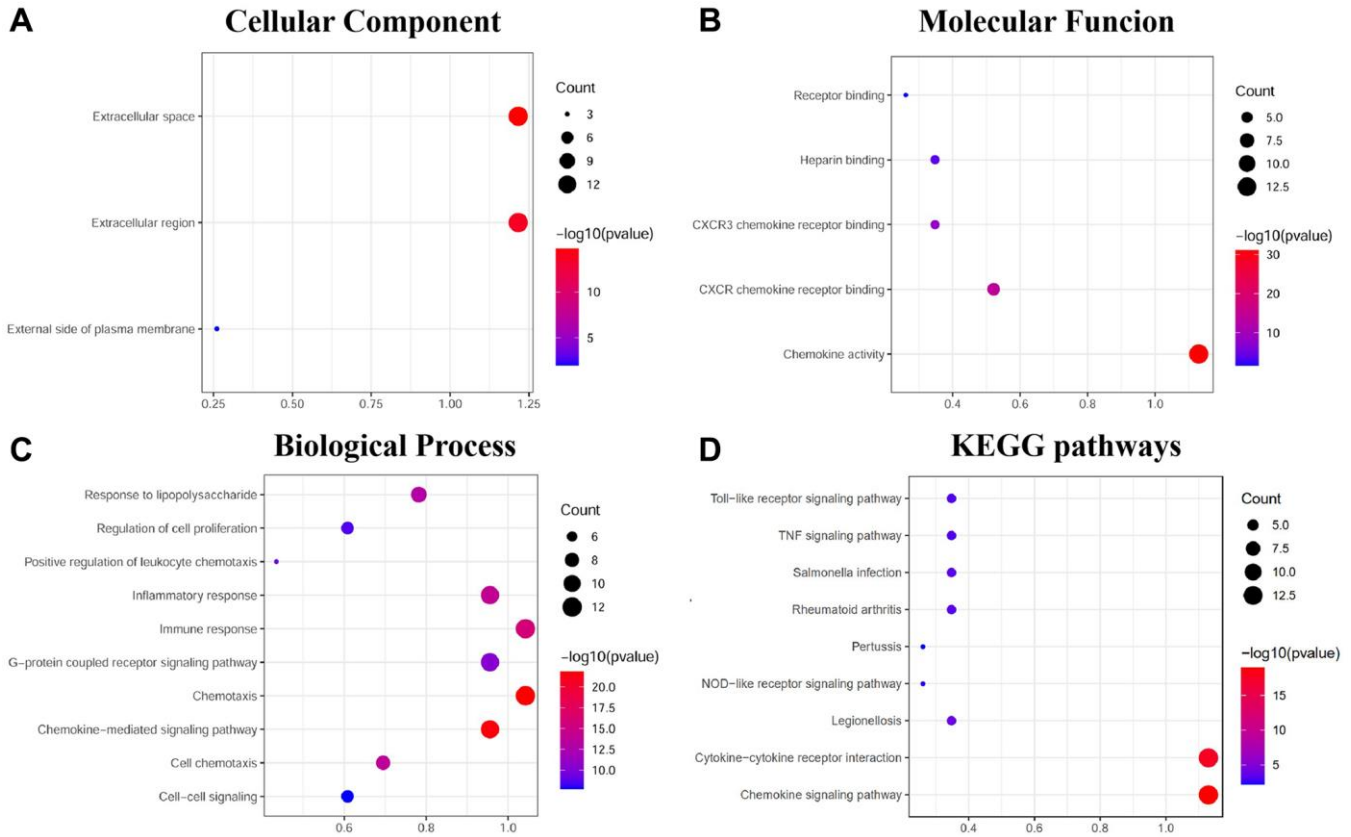

**Supplementary Figure 1.** The enrichment analysis of different expressed CXC chemokines in CRC (David 6.8), including (A) cellular components (CC), (B) molecular functions (MF), (C) biological processes (BP), and (D) KEGG enriched terms.

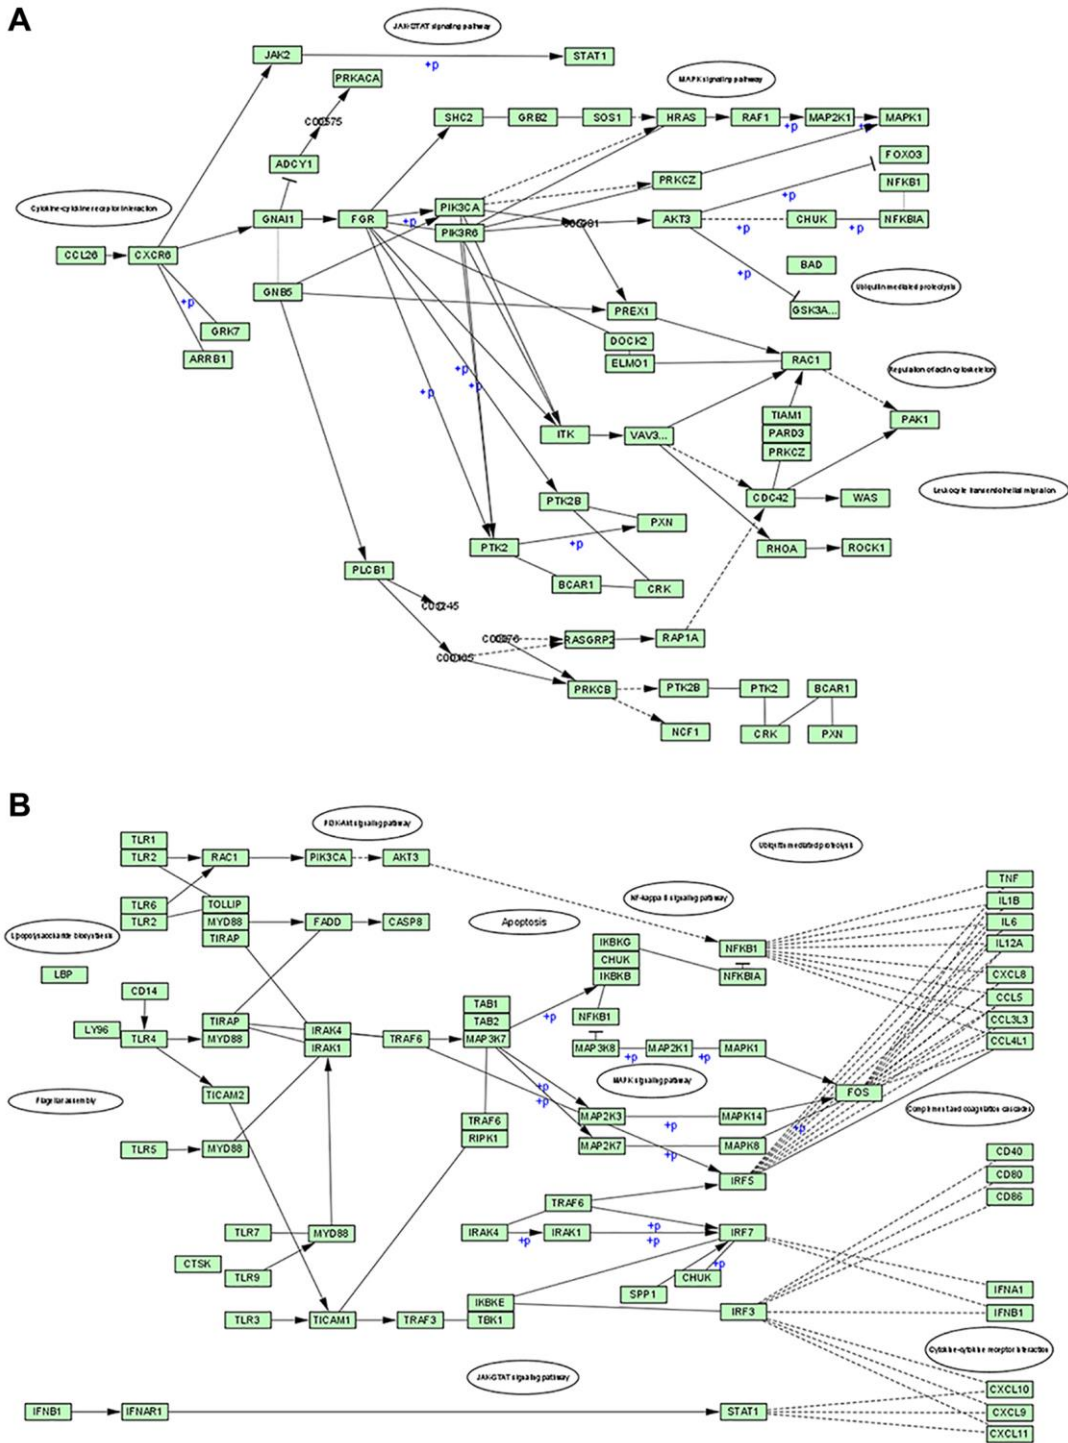

**Supplementary Figure 2. (A) Chemokine signaling pathway and (B) toll-like receptor signaling regulated by the CXC chemokines in CRC.**
