# Supplementary material for: Comprehensive analysis of the prognosis and immune infiltration for CXC chemokines in colorectal cancer
Source: PubMed Central journal article supplement (PMC8312455; doi:10.18632/aging.203245), 2021-07-07
Supplement: aging-13-203245-s002.pdf [file aging-13-203245-s002.pdf]

## SUPPLEMENTARY TABLES

Supplementary Table 1. Correlation between different expressed CXC chemokines and the tumor stage of CRC patients (GEPIA).

|        | <i>P</i> (>F) |                |                |
|--------|---------------|----------------|----------------|
|        | COAD + READ   | COAD           | READ           |
| CXCL1  | <b>0.0345</b> | 0.287          | 0.0523         |
| CXCL2  | <b>0.0156</b> | 0.131          | <b>0.0371</b>  |
| CXCL3  | <b>0.0344</b> | 0.316          | <b>0.00868</b> |
| CXCL4  | 0.645         | 0.945          | 0.422          |
| CXCL5  | 0.768         | 0.783          | 0.615          |
| CXCL6  | 0.287         | 0.545          | 0.299          |
| CXCL7  | 0.519         | 0.377          | 0.902          |
| CXCL8  | 0.417         | 0.665          | 0.598          |
| CXCL9  | <b>0.0122</b> | <b>0.00267</b> | 0.971          |
| CXCL10 | <b>0.0108</b> | <b>0.00584</b> | 0.895          |
| CXCL11 | <b>0.0227</b> | <b>0.0384</b>  | 0.888          |
| CXCL12 | 0.881         | 0.738          | 0.361          |
| CXCL13 | 0.217         | 0.169          | 0.918          |
| CXCL14 | 0.28          | 0.239          | 0.108          |
| CXCL16 | 0.274         | 0.165          | 0.96           |
| CXCL17 | 0.59          | 0.68           | 0.621          |

Abbreviations: COAD: colon adenocarcinoma; READ: rectum adenocarcinoma.

Supplementary Table 2. The prognostic value of different expressed CXC chemokines in CRC patients in OS and DFS (GEPIA).

|        | Logrank <i>P</i> (OS) |              |       | Logrank <i>P</i> (DFS) |               |       |
|--------|-----------------------|--------------|-------|------------------------|---------------|-------|
|        | COAD + READ           | COAD         | READ  | COAD + READ            | COAD          | READ  |
| CXCL1  | 0.06                  | 0.13         | 0.41  | 0.49                   | 0.34          | 0.73  |
| CXCL2  | <b>0.052</b>          | <b>0.042</b> | 0.49  | 0.35                   | 0.49          | 0.2   |
| CXCL3  | <b>0.015</b>          | <b>0.047</b> | 0.17  | 0.51                   | 0.46          | 0.83  |
| CXCL4  | 0.34                  | 0.52         | 0.018 | 0.43                   | 0.42          | 0.15  |
| CXCL5  | 0.62                  | 0.68         | 0.9   | 0.079                  | 0.21          | 0.27  |
| CXCL6  | 0.11                  | 0.44         | 0.068 | 0.12                   | 0.35          | 0.15  |
| CXCL7  | 0.66                  | 0.22         | 0.13  | 0.14                   | 0.084         | 0.78  |
| CXCL8  | <b>0.032</b>          | <b>0.05</b>  | 0.96  | 0.28                   | 0.41          | 0.67  |
| CXCL9  | 0.45                  | 0.55         | 0.38  | <b>0.059</b>           | <b>0.026</b>  | 0.66  |
| CXCL10 | 0.47                  | 0.56         | 0.29  | <b>0.0019</b>          | <b>0.0011</b> | 0.64  |
| CXCL11 | 0.61                  | 0.54         | 0.32  | <b>0.0096</b>          | <b>0.0045</b> | 0.57  |
| CXCL12 | 0.4                   | 0.68         | 0.91  | 0.086                  | 0.46          | 0.099 |
| CXCL13 | 0.24                  | 0.61         | 0.13  | 0.52                   | 0.27          | 0.97  |
| CXCL14 | <b>0.039</b>          | <b>0.045</b> | 0.18  | 0.14                   | 0.16          | 0.69  |
| CXCL16 | 0.15                  | 0.11         | 0.52  | 0.37                   | 0.18          | 0.54  |
| CXCL17 | 0.95                  | 0.94         | 0.11  | 0.78                   | 0.78          | 0.99  |

Abbreviations: OS: overall survival; DFS: disease free survival; COAD: colon adenocarcinoma; READ: rectum adenocarcinoma.
